# Supplementary material for: Targeting Mannitol Metabolism as an Alternative Antimicrobial Strategy Based on the Structure-Function Study of Mannitol-1-Phosphate Dehydrogenase in Staphylococcus aureus
Source: PubMed Central journal article supplement (PMC6623548; doi:10.1128/mbio.02660-18), 2019-07-09
Supplement: mBio.02660-18-sf001.pdf [file mBio.02660-18-sf001.pdf]

**Fig. S1**

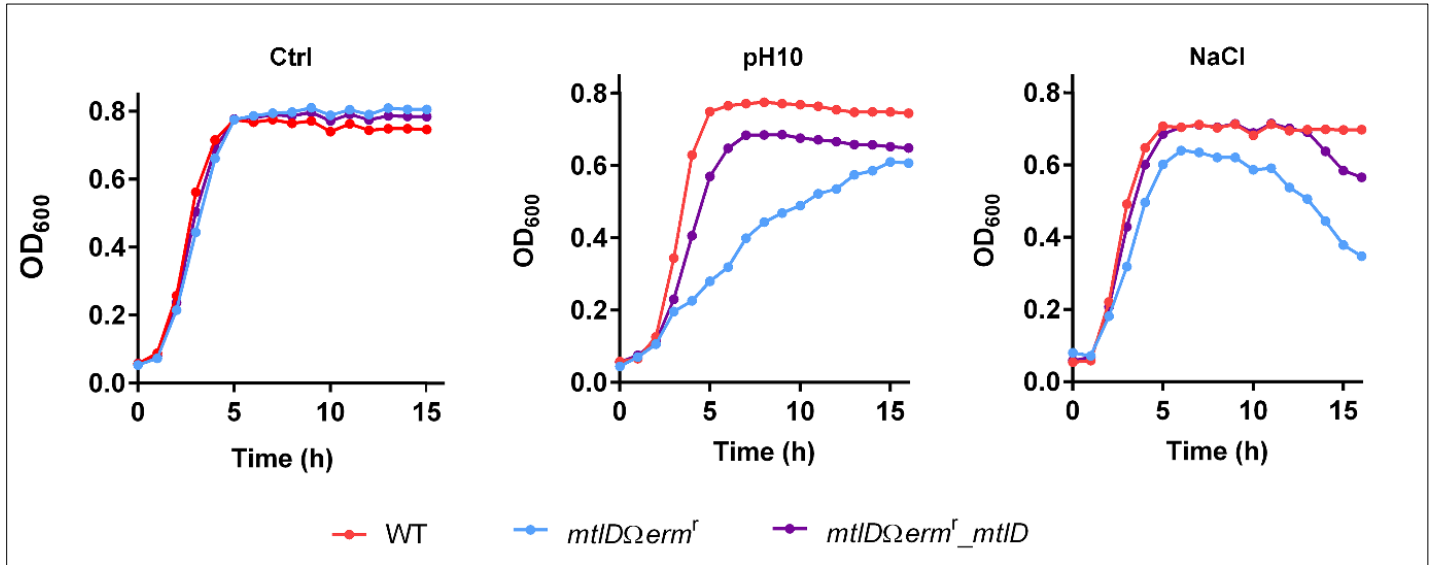

**Fig. S1. Growth profiles of *S. aureus* USA300 strains under control physiological and various stress conditions.** Growths of WT, knockout (*mtlD*Δ*erm*<sup>r</sup>), and *mtlD*Δ*erm*<sup>r</sup> complemented with wild type *mtlD* (*mtlD*Δ*erm*<sup>r</sup>\_*mtlD*) *S. aureus* strains were assessed in 96-well plates by monitoring optical density at 600 nm (OD<sub>600</sub>) up to 16 h at 37 °C in BHI media without (Ctrl) or with adjusted alkaline pH (pH 10) using NaOH or supplemented with 0.2 M NaCl (NaCl). Data points are averaged from three independent measurements with standard deviations less than 5%.
