# Supplementary material for: Targeting Mannitol Metabolism as an Alternative Antimicrobial Strategy Based on the Structure-Function Study of Mannitol-1-Phosphate Dehydrogenase in Staphylococcus aureus
Source: PubMed Central journal article supplement (PMC6623548; doi:10.1128/mbio.02660-18), 2019-07-09
Supplement: mBio.02660-18-sf002.pdf [file mBio.02660-18-sf002.pdf]

**Fig. S2**

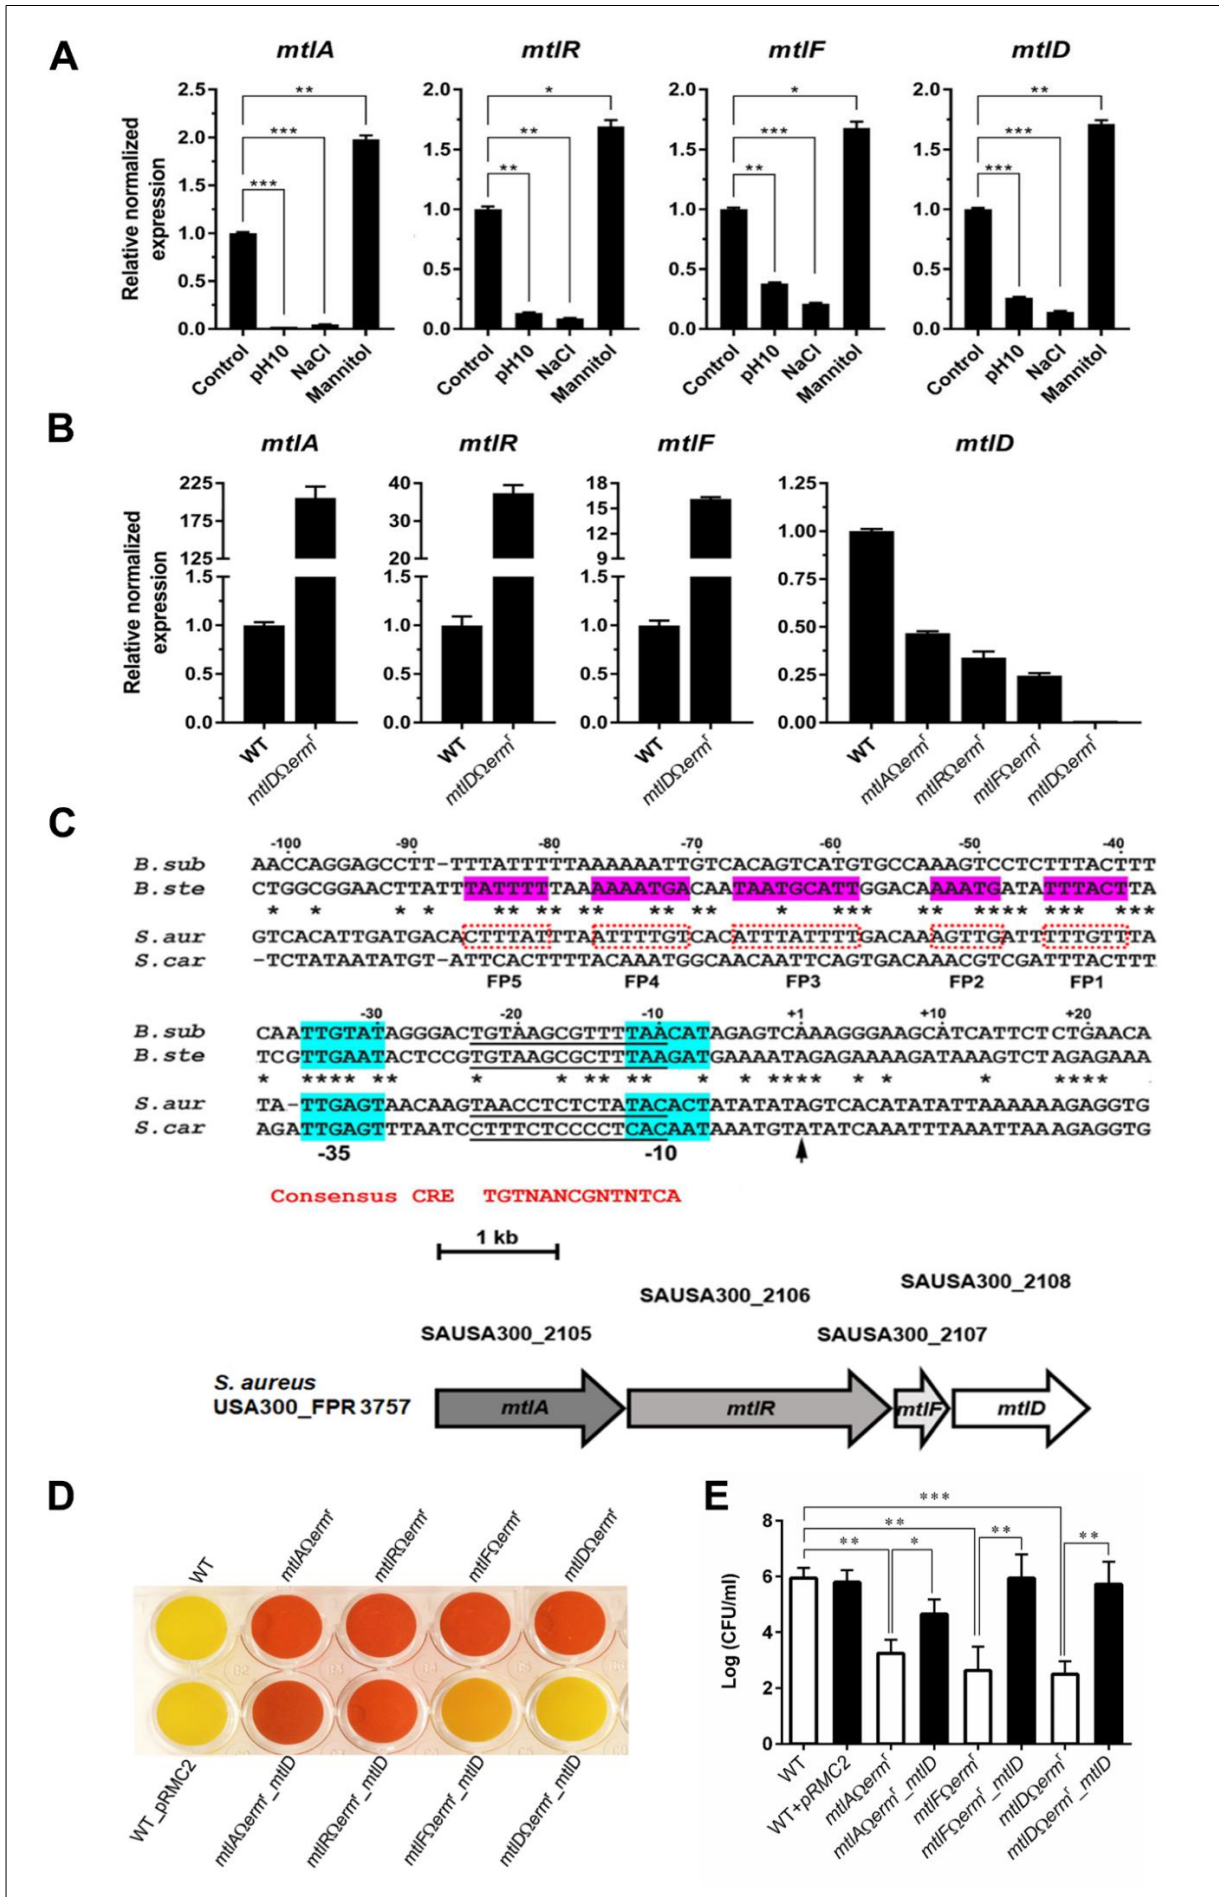

**Fig. S2. Transcriptional profiles of *mtlARFD* in wild type *S. aureus* USA300 and in isogenic mutants of *bursa aurealis* transposon in individual genes of *mtl*-operon for phenotypic assessments of mannitol catabolism and alkalinity stress.** (A) qRT-PCR data showing the expression profile of *mtlA*, *mtlR*, *mtlF*, and *mtlD* under physiological (control); and pH, salt & mannitol stress conditions. Briefly, *S. aureus* cells were exposed to either BHI media (control) or modified BHI media mimicking stress conditions (pH 10.0, 0.2 M NaCl, and 27.5 mM mannitol) for 30 min at 37 °C. The *S. aureus* cells were harvested, and total RNA from individual samples were isolated and reversed transcribed. Relative abundance of each gene within *mtlARFD* operon was determined by a qRT-PCR analysis wherein *rpoB*, *rho* (1); and 16S rRNA genes served as internal controls. The mRNA levels of target genes were compared as control *versus* stress conditions indicated in graphs. (B) The expression profile of individual genes of *mtl*-operon in isogenic mutants. (C) Phenotypic assessment of mannitol operon mutants using mannitol catabolism assay wherein (I) showing the sequence similarity of the mannitol operon promoter region of *S. aureus* USA300 with *B. subtilis*, *B. stearothermophilus*, *S. carnosus* (2), and (II) depicts the arrangement of mannitol operon (*mtlARFD*) in *S. aureus* USA300 FPR3757 (NC\_007793.1). (D) Assessment of mannitol catabolism in WT *S. aureus* or its pRMC2 supplemented strains (empty plasmid control) served as controls in mannitol catabolism assay (WT and WT\_pRMC2). The isogenic insertion mutants in *mtl*-operon, *mtlARFD* (*mtlA*Ω $\text{erm}^r$ , *mtlR*Ω $\text{erm}^r$ , *mtlF*Ω $\text{erm}^r$ , and *mtlD*Ω $\text{erm}^r$ ) were supplemented with wild type *SaM1PDH* encoding plasmid, pRMC2\_*mtlD* and were designated as *mtlA*Ω $\text{erm}^r$ \_mtlD, *mtlR*Ω $\text{erm}^r$ \_mtlD, *mtlF*Ω $\text{erm}^r$ \_mtlD, and *mtlD*Ω $\text{erm}^r$ \_mtlD. These ten strains were cultured under static culture conditions in mannitol (55 mM) phenol red broth for 24 h at 37 °C before being photographed. The phenol red color turned into yellow, which indicates mannitol catabolism. Supplementation of pRMC2\_*mtlD* in *mtlA*Ω $\text{erm}^r$  (*mtlA*Ω $\text{erm}^r$ \_mtlD) and *mtlR*Ω $\text{erm}^r$  (*mtlR*Ω $\text{erm}^r$ \_mtlD) mutants could not recover the mannitol catabolism ability. Interestingly, the *mtlF*Ω $\text{erm}^r$  mutant supplementation of *mtlD* (*mtlF*Ω $\text{erm}^r$ \_mtlD) could partially recover the mannitol catabolism compared to the complemented strain of *mtlD*Ω $\text{erm}^r$  (*mtlD*Ω $\text{erm}^r$ \_mtlD). This result indicated that the *mtlA* seems to be a major component responsible for mannitol uptake in *S. aureus* USA300. (E) Assessment of comparative alkalinity stress response of mannitol-specific PTS mutants, *mtlA*Ω $\text{erm}^r$  and *mtlF*Ω $\text{erm}^r$  with *mtlD*Ω $\text{erm}^r$  mutant. Overnight cultures of indicated *S. aureus* strains were diluted to  $1 \times 10^8$  cells in the alkaline BHI media (pH 10) and incubated at 37 °C for 5 h. Bacterial counts were quantified by using CFU assays. All the *mtlA*Ω $\text{erm}^r$ , *mtlF*Ω $\text{erm}^r$ , and *mtlD*Ω $\text{erm}^r$  mutants were found to be susceptible compared to the WT exposed to the same stress conditions. The comparable survival of *mtlF*Ω $\text{erm}^r$ \_mtlD strain with *mtlD*Ω $\text{erm}^r$ \_mtlD and WT or WT\_pRMC2, further supported that the mannitol-specific PTS enzyme IIBC is the major component of mannitol-specific PTS system. Data are presented as means  $\pm$  standard deviation, which were determined from two biological replicates. Statistical significance was calculated by Student's *t*-test (\*  $p < 0.05$ , \*\*  $p < 0.01$ , \*\*\*  $p < 0.001$ ).

## References

1. Sihto HM, Tasara T, Stephan R, Johler S. 2014. Validation of reference genes for normalization of qPCR mRNA expression levels in *Staphylococcus aureus* exposed to osmotic and lactic acid stress conditions encountered during food production and preservation. FEMS Microbiol Lett 356:134-40.
2. Henstra SA, Tuinhof M, Duurkens RH, Robillard GT. 1999. The *Bacillus Stearothermophilus* mannitol regulator, MtlR, of the phosphotransferase system - A DNA-binding protein, regulated by HPr and IICB *mtl*-dependent phosphorylation. J Biol Chem 274:4754-4763.
