# Supplementary material for: Targeting Mannitol Metabolism as an Alternative Antimicrobial Strategy Based on the Structure-Function Study of Mannitol-1-Phosphate Dehydrogenase in Staphylococcus aureus
Source: PubMed Central journal article supplement (PMC6623548; doi:10.1128/mbio.02660-18), 2019-07-09
Supplement: mBio.02660-18-sf006.pdf [file mBio.02660-18-sf006.pdf]

**Fig. S6**

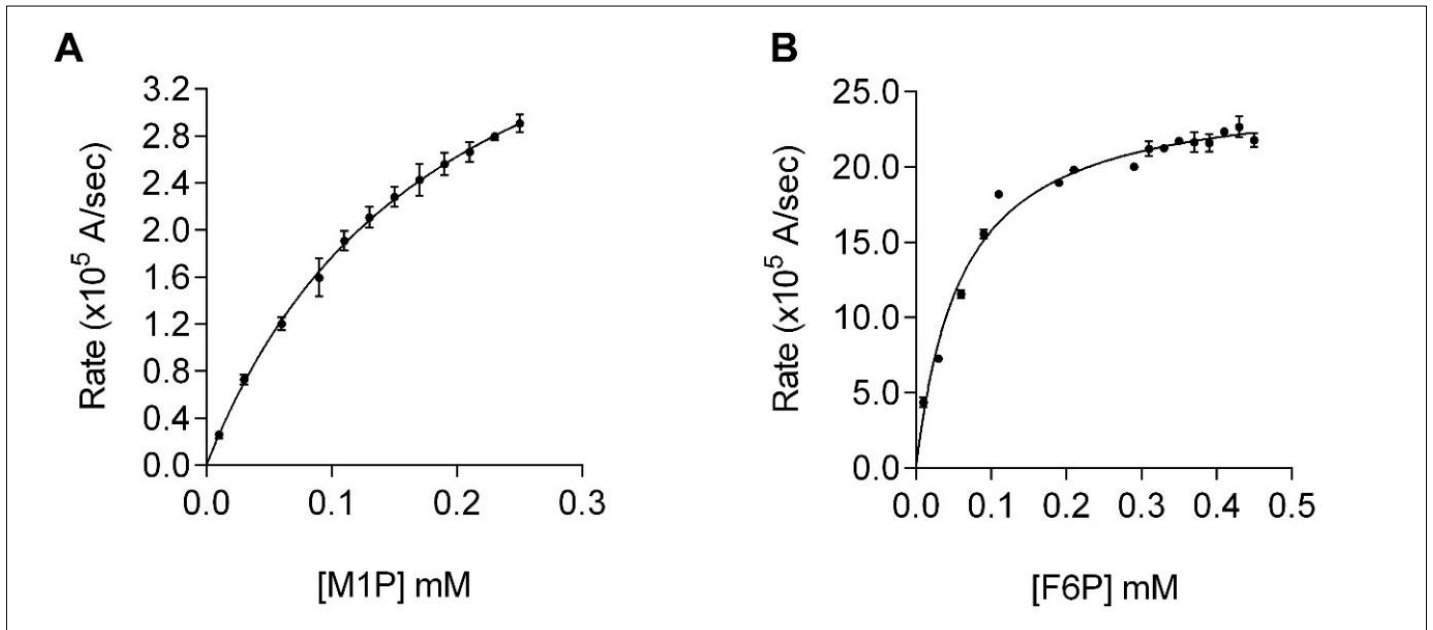

**Fig. S6. Determination of Michaelis-Menten kinetic parameters for *SaM1PDH* oxidoreductase activity. (A)** Determination of  $K_m$  (substrate concentration that yields a half-maximal velocity) and  $V_{max}$  (maximal velocity) values for *SaM1PDH* mannitol-1-phosphate (M1P) oxidase activity. **(B)** Determination of  $K_m$  and  $V_{max}$  values for *SaM1PDH* fructose-6-phosphate (F6P) reductase activity. In a typical reaction, purified *SaM1PDH* was incubated with cofactor (M1P oxidation,  $\text{NAD}^+$ ; F6P reduction,  $\text{NADH}$ ) and various concentrations of substrate (oxidation reaction, 0–250  $\mu\text{M}$  M1P; reduction reaction, 0–450  $\mu\text{M}$  F6P). At each substrate concentration, initial enzymatic velocity was determined after 1 min reaction at 30 °C by measuring change in absorbance of  $\text{NADH}$  at 340 nm in reaction with substrate compared to that in control reaction without substrate and expressed as absorbance change per second (A/sec). Graphs were constructed by plotting initial enzymatic velocities against substrate concentrations. Dots represent mean values obtained from three independent measurements, whereas whiskers represent one standard deviations of the means. Solid lines represent the best-fit curves determined by nonlinear regression analyses using GraphPad Prism 7 for Mac (<http://www.graphpad.com>) to calculate  $K_m$  and  $V_{max}$  values.
