# Supplementary material for: Targeting Mannitol Metabolism as an Alternative Antimicrobial Strategy Based on the Structure-Function Study of Mannitol-1-Phosphate Dehydrogenase in Staphylococcus aureus
Source: PubMed Central journal article supplement (PMC6623548; doi:10.1128/mbio.02660-18), 2019-07-09
Supplement: mBio.02660-18-st001.pdf [file mBio.02660-18-st001.pdf]

**Table S1. Presence (○) and absence (×) of M1PDH and M2DH in different *S. aureus* strains, plant, and fungi.**

| Strains/organisms                          | M1PDH | M2DH | GenBank Accession No. or References |
|--------------------------------------------|-------|------|-------------------------------------|
| <i>S. aureus</i> MRSA252                   | ○     | ×    | <a href="#">BX571856.1</a>          |
| <i>S. aureus</i> 13420                     | ○     | ×    | <a href="#">CP021141.1</a>          |
| <i>S. aureus</i> 0201753-2                 | ○     | ×    | <a href="#">CP021352.1</a>          |
| <i>S. aureus</i> AR_0470                   | ○     | ×    | <a href="#">CP029653.1</a>          |
| <i>S. aureus</i> CFSAN007896               | ○     | ×    | <a href="#">CP020467.1</a>          |
| <i>S. aureus</i> CFSAN018749               | ○     | ×    | <a href="#">CP028190.1</a>          |
| <i>S. aureus</i> NRS143                    | ○     | ×    | <a href="#">CP026071.1</a>          |
| <i>S. aureus</i> Seattle 1945 isolate G478 | ○     | ×    | <a href="#">CP021907.1</a>          |
| <i>S. aureus</i> SJTUF_J27                 | ○     | ×    | <a href="#">CP019117.1</a>          |
| <i>S. aureus</i> FORC_001                  | ○     | ×    | <a href="#">CP009554.1</a>          |
| <i>S. aureus</i> ATCC 25923                | ○     | ×    | <a href="#">CP009361.1</a>          |
| <i>S. aureus</i> NRS484                    | ○     | ×    | <a href="#">CP026066.1</a>          |
| <i>S. aureus</i> CFSAN007847               | ○     | ×    | <a href="#">CP017684.1</a>          |
| <i>S. aureus</i> TCH60                     | ○     | ×    | <a href="#">CP002110.1</a>          |
| <i>S. aureus</i> Tager 104                 | ○     | ×    | <a href="#">CP012409.1</a>          |
| <i>S. aureus</i> 6850                      | ○     | ×    | <a href="#">CP006706.1</a>          |
| <i>S. aureus</i> LGA251                    | ○     | ×    | <a href="#">FR821779.1</a>          |
| <i>S. aureus</i> NRS153                    | ○     | ×    | <a href="#">CP026067.1</a>          |
| <i>S. aureus</i> 93b_S9                    | ○     | ×    | <a href="#">CP010952.1</a>          |
| <i>S. aureus</i> SA40TW                    | ○     | ×    | <a href="#">CP013182.1</a>          |
| <i>Platymonas subcordiformis</i>           | ○     | ○    | Reference (1)                       |
| <i>Aspergillus fumigatus</i>               | ○     | ○    | Reference (2)                       |

## References

1. Richter DFE, Kirst GO. 1987. d-Mannitol dehydrogenase and d-mannitol-1-phosphate dehydrogenase in *Platymonas subcordiformis*: some characteristics and their role in osmotic adaptation. *Planta* 170:528-534.
2. Krahulec S, Armao GC, Klimacek M, Nidetzky B. 2011. Enzymes of mannitol metabolism in the human pathogenic fungus *Aspergillus fumigatus* - kinetic properties of mannitol-1-phosphate 5-dehydrogenase and mannitol 2-dehydrogenase, and their physiological implications. *Febs Journal* 278:1264-1276.
