# Supplementary material for: Targeting Mannitol Metabolism as an Alternative Antimicrobial Strategy Based on the Structure-Function Study of Mannitol-1-Phosphate Dehydrogenase in Staphylococcus aureus
Source: PubMed Central journal article supplement (PMC6623548; doi:10.1128/mbio.02660-18), 2019-07-09
Supplement: mBio.02660-18-st002.pdf [file mBio.02660-18-st002.pdf]

**Table S2. Primers, plasmids and bacterial strains used in this study.****A. Primers used in this study**

| Primer name            | Sequence (5'→3') <sup>a</sup>                                                 | Purpose                                                         |
|------------------------|-------------------------------------------------------------------------------|-----------------------------------------------------------------|
| <i>mtlD</i> _fwd       | TAGGATCCATGAAAGCAGTTCACCTTTGGTG ( <i>Bam</i> HI)                              | cloning of <i>S. aureus mtlD</i> gene into plasmid pVFT1S       |
| <i>mtlD</i> _rev       | GTCTCGAGTTATGAAAGTGAATTGTACGCTTCA ( <i>Xho</i> I)                             |                                                                 |
| <i>mtlD</i> _comp._fwd | ATTATAGGTACCAGAAA <b>GGAGGT</b> AAACATATGAAAGCAGTTC<br>ACTTTG ( <i>Kpn</i> I) | cloning of <i>mtlD</i> wild type and mutants into plasmid pRMC2 |
| <i>mtlD</i> _comp._rev | AATAATGAATTCTTATGAAAGTGAATTGTAC ( <i>Eco</i> RI)                              |                                                                 |
| <i>R283S</i> _fwd      | CACGTGTCGGAAGCGGTACATTACGTAAAATTGGCCC                                         | introducing <i>R283S</i> mutation into <i>mtlD</i>              |
| <i>R283S</i> _rev      | GGGCAATTTTACGTAATGTACCGCTTCCGACACGTG                                          |                                                                 |
| <i>R287S</i> _fwd      | GTCGGACGAGGTACATTAAGTAAAATTGGCCCTAAAG                                         | introducing <i>R287S</i> mutation into <i>mtlD</i>              |
| <i>R287S</i> _rev      | CTTTAGGGCCAATTTTACTTAATGTACCTCGTCCGAC                                         |                                                                 |
| <i>R294F</i> _fwd      | GCCCTAAAGATTTTCATTATAAAAAC                                                    | introducing <i>R294F</i> mutation into <i>mtlD</i>              |
| <i>R294F</i> _rev      | GGTTTTATAATGAAATCTTTAGGGC                                                     |                                                                 |
| <i>mtlA</i> _fwd       | <b>AGCAATTCCTCATGGCACAG</b>                                                   | qRT-PCR for <i>mtlA</i> gene                                    |
| <i>mtlA</i> _rev       | <b>TTACCAGCAATTCCCACGAC</b>                                                   |                                                                 |
| <i>mtlR</i> _fwd       | <b>TCGTTTGCAGCAGTGGTATG</b>                                                   | qRT-PCR for <i>mtlR</i> gene                                    |
| <i>mtlR</i> _rev       | <b>ATCGCTGACTGATGCTTGTG</b>                                                   |                                                                 |
| <i>mtlF</i> _fwd       | <b>AAAGGCACTGCAAAGCAAC</b>                                                    | qRT-PCR for <i>mtlF</i> gene                                    |
| <i>mtlF</i> _rev       | <b>TGCAACACCAGTCATTCCAC</b>                                                   |                                                                 |
| <i>mtlD</i> _fwd       | <b>TGGCTTACGCCGTGTTTTAG</b>                                                   | qRT-PCR for <i>mtlD</i> gene                                    |
| <i>mtlD</i> _rev       | <b>AATGTACCTCGTCCGACACG</b>                                                   |                                                                 |
| <i>rho</i> _fwd        | <b>AACGTTTGACGAACCACCAG</b>                                                   | qRT-PCR for <i>rho</i> gene                                     |
| <i>rho</i> _rev        | <b>ATAAGCGCGTGCTAATCTCG</b>                                                   |                                                                 |
| <i>rpoB</i> _fwd       | <b>TGAAGAGAACGGCGTTGAG</b>                                                    | qRT-PCR for <i>rpoB</i> gene                                    |
| <i>rpoB</i> _rev       | <b>CCAACCTGCAACGATTGGAC</b>                                                   |                                                                 |

<sup>a</sup> The restriction sites are underlined, and the corresponding restriction endonucleases are shown in parentheses. The Shine-Dalgarno sequence of *gapA* promoter is in bold.

## B. Plasmids used in this study.

| Plasmids             | Descriptions                                                                                                                             | References                  |
|----------------------|------------------------------------------------------------------------------------------------------------------------------------------|-----------------------------|
| pVFT1S               | <i>km<sup>r</sup></i> ; expression vector tagging His <sub>6</sub> to the N-terminus of proteins                                         | Korean Patent 1020050051893 |
| pVFT1S_ <i>mtlD</i>  | <i>km<sup>r</sup></i> ; pVFT1S expressing <i>SaM1PDH</i> wild type                                                                       | This study                  |
| pVFT1S_ <i>R283S</i> | <i>km<sup>r</sup></i> ; pVFT1S expressing <i>SaM1PDH R283S</i> mutant                                                                    | This study                  |
| pVFT1S_ <i>R287S</i> | <i>km<sup>r</sup></i> ; pVFT1S expressing <i>SaM1PDH R287S</i> mutant                                                                    | This study                  |
| pVFT1S_ <i>R294F</i> | <i>km<sup>r</sup></i> ; pVFT1S expressing <i>SaM1PDH R294</i> mutant                                                                     | This study                  |
| pRMC2                | <i>amp<sup>r</sup></i> , <i>cm<sup>r</sup></i> ; expression vector under control of tetracycline inducible P <sub><i>xyll/tetO</i></sub> | Reference (1)               |
| pRMC2_ <i>mtlD</i>   | <i>amp<sup>r</sup></i> , <i>cm<sup>r</sup></i> ; pRMC2 expressing <i>SaM1PDH</i> wild type                                               | This study                  |
| pRMC2_ <i>R283S</i>  | <i>amp<sup>r</sup></i> , <i>cm<sup>r</sup></i> ; pRMC2 expressing <i>SaM1PDH R283S</i> mutant                                            | This study                  |
| pRMC2_ <i>R287S</i>  | <i>amp<sup>r</sup></i> , <i>cm<sup>r</sup></i> ; pRMC2 expressing <i>SaM1PDH R287S</i> mutant                                            | This study                  |
| pRMC2_ <i>R294F</i>  | <i>amp<sup>r</sup></i> , <i>cm<sup>r</sup></i> ; pRMC2 expressing <i>SaM1PDH R294F</i> mutant                                            | This study                  |

### C. Bacterial strains used in this study.

| Strains                                            | Descriptions                                                                                                        | Sources or References |
|----------------------------------------------------|---------------------------------------------------------------------------------------------------------------------|-----------------------|
| <i>Escherichia coli</i>                            |                                                                                                                     |                       |
| DH5 $\alpha$                                       | Strain for cloning and plasmid amplification                                                                        | Invitrogen, USA       |
| BL21(DE3)                                          | Strain for protein overexpression                                                                                   | Novagen, USA          |
| B834(DE3)                                          | Strain for selenomethionine-substituted protein overexpression                                                      | Novagen, USA          |
| <i>Staphylococcus aureus</i>                       |                                                                                                                     |                       |
| RN4220                                             | Restriction-deficient strain of NCTC8325                                                                            | Reference (2)         |
| RN_RMC2                                            | <i>cm<sup>r</sup></i> , <i>amp<sup>r</sup></i> ; RN4220 bearing plasmid pRMC2                                       | This study            |
| RN_ <i>mtlD</i>                                    | <i>amp<sup>r</sup></i> , <i>cm<sup>r</sup></i> ; RN4220 bearing plasmid pRMC2_ <i>mtlD</i>                          | This study            |
| RNR283S                                            | <i>amp<sup>r</sup></i> , <i>cm<sup>r</sup></i> ; RN4220 bearing plasmid pRMC2_ <i>R283S</i>                         | This study            |
| RNR287S                                            | <i>amp<sup>r</sup></i> , <i>cm<sup>r</sup></i> ; RN4220 bearing plasmid pRMC2_ <i>R287S</i>                         | This study            |
| RNR294F                                            | <i>amp<sup>r</sup></i> , <i>cm<sup>r</sup></i> ; RN4220 bearing plasmid pRMC2_ <i>R294F</i>                         | This study            |
| WT SAUSA300                                        | JE2, wild-type epidemic community-associated methicillin-resistant <i>S. aureus</i> isolate USA300 LAC              | Nebraska library (3)  |
| <i>mtlA</i> $\Omega$ <i>erm<sup>r</sup></i>        | NE929, <i>erm<sup>r</sup></i> ; JE2 bearing <i>mtlA::Tn917</i>                                                      | Nebraska library (3)  |
| <i>mtlR</i> $\Omega$ <i>erm<sup>r</sup></i>        | NE837, <i>erm<sup>r</sup></i> ; JE2 bearing <i>mtlR::Tn917</i>                                                      | Nebraska library (3)  |
| <i>mtlF</i> $\Omega$ <i>erm<sup>r</sup></i>        | NE1737, <i>erm<sup>r</sup></i> ; JE2 bearing <i>mtlF::Tn917</i>                                                     | Nebraska library (3)  |
| <i>mtlD</i> $\Omega$ <i>erm<sup>r</sup></i>        | NE1263, <i>erm<sup>r</sup></i> ; JE2 bearing <i>mtlD::Tn917</i>                                                     | Nebraska library (3)  |
| WT SAUSA300_pRMC2                                  | <i>cm<sup>r</sup></i> , <i>amp<sup>r</sup></i> ; WT SAUSA300 bearing plasmid pRMC2                                  | This study            |
| <i>mtlD</i> $\Omega$ <i>erm<sup>r</sup></i> _pRMC2 | <i>erm<sup>r</sup></i> , <i>amp<sup>r</sup></i> , <i>cm<sup>r</sup></i> ; NE1263 bearing plasmid pRMC2              | This study            |
| <i>mtlD</i> $\Omega$ <i>erm<sup>r</sup></i> _mtlD  | <i>erm<sup>r</sup></i> , <i>amp<sup>r</sup></i> , <i>cm<sup>r</sup></i> ; NE1263 bearing plasmid pRMC2_ <i>mtlD</i> | This study            |

|                                                              |                                                                                                                        |            |
|--------------------------------------------------------------|------------------------------------------------------------------------------------------------------------------------|------------|
| <i>mtlD</i> Ω <i>erm</i> <sup>r</sup> <sub>R283S</sub>       | <i>erm</i> <sup>r</sup> , <i>amp</i> <sup>r</sup> , <i>cm</i> <sup>r</sup> ; NE1263 bearing plasmid pRMC2_R283S        | This study |
| <i>mtlD</i> Ω <i>erm</i> <sup>r</sup> <sub>R287S</sub>       | <i>erm</i> <sup>r</sup> , <i>amp</i> <sup>r</sup> , <i>cm</i> <sup>r</sup> ; NE1263 bearing plasmid pRMC2_R287S        | This study |
| <i>mtlD</i> Ω <i>erm</i> <sup>r</sup> <sub>R294F</sub>       | <i>erm</i> <sup>r</sup> , <i>amp</i> <sup>r</sup> , <i>cm</i> <sup>r</sup> ; NE1263 bearing plasmid pRMC2_R294F        | This study |
| <i>mtlA</i> Ω <i>erm</i> <sup>r</sup> <sub><i>mtlD</i></sub> | <i>erm</i> <sup>r</sup> , <i>amp</i> <sup>r</sup> , <i>cm</i> <sup>r</sup> ; NE929 bearing plasmid pRMC2_ <i>mtlD</i>  | This study |
| <i>mtlR</i> Ω <i>erm</i> <sup>r</sup> <sub><i>mtlD</i></sub> | <i>erm</i> <sup>r</sup> , <i>amp</i> <sup>r</sup> , <i>cm</i> <sup>r</sup> ; NE837 bearing plasmid pRMC2_ <i>mtlD</i>  | This study |
| <i>mtlF</i> Ω <i>erm</i> <sup>r</sup> <sub><i>mtlD</i></sub> | <i>erm</i> <sup>r</sup> , <i>amp</i> <sup>r</sup> , <i>cm</i> <sup>r</sup> ; NE1737 bearing plasmid pRMC2_ <i>mtlD</i> | This study |
| WT_pRMC2                                                     | <i>cm</i> <sup>r</sup> ; WT SAUSA300 bearing plasmid pRMC2                                                             | This study |

---

## References

1. Corrigan RM, Foster TJ. 2009. An improved tetracycline-inducible expression vector for *Staphylococcus aureus*. *Plasmid* 61:126-9.
2. Peng HL, Novick RP, Kreiswirth B, Kornblum J, Schlievert P. 1988. Cloning, characterization, and sequencing of an accessory gene regulator (*agr*) in *Staphylococcus aureus*. *J Bacteriol* 170:4365-72.
3. Fey PD, Endres JL, Yajjala VK, Widhelm TJ, Boissy RJ, Bose JL, Bayles KW. 2013. A genetic resource for rapid and comprehensive phenotype screening of nonessential *Staphylococcus aureus* genes. *MBio* 4:e00537-12.
